# Supplementary material
Source: MDPI journal article supplement (https://www.mdpi.com/1996-1073/12/3/485)
Supplement: s1 [file s1]

## Sheet: calc
Validation of the empirical return temperature equation. Eq. (11) in the paper
Ti	21	Internal air temperature
H	0.92448	Radiator constant
n	1.2	Radiator exponent
T_d	60	Design supply temperature
ΔT_d	20	Design temperature drop
P_d	50	Design power output
m_d	0.000597086	Design mass flow
LMTD_d	27.8117	Design logarithmic mean temperature difference
mcp	2.5	mass*cp
cp	4187	specific heat capacity
a	1.1	helper variable
b	0.355516	helper variable
Supply temperature look-up table
T_e	T_sup	T_ret
-30	60	40
-20	60	40
18	18	18
30	18	18
T_e	T_sup	T_ret	T_ret2	T_lmtd	T_lmtd2	P	P2	T_ret_control	T_ret_control2	Diff	pos
-25	60	40	40	27.8117	27.8117	50	50	40	40	0	1
-24	60	40	40	27.8117	27.8117	50	50	40	40	0	1
-23	60	40	40	27.8117	27.8117	50	50	40	40	0	1
-22	60	40	40	27.8117	27.8117	50	50	40	40	0	1
-21	60	40	40	27.8117	27.8117	50	50	40	40	0	1
-20	60	40	40	27.8117	27.8117	50	50	40	40	0	2
-19	58.8947	39.5173	39.4615	27.0594	27.0235	48.3816	48.3045	39.5421	39.573	-0.0247722	2
-18	57.7895	39.0328	38.9231	26.306	26.2353	46.7696	46.6188	39.0816	39.142	-0.0488007	2
-17	56.6842	38.5465	38.3846	25.5513	25.4471	45.1641	44.9432	38.6186	38.7069	-0.072061	2
-16	55.5789	38.0582	37.8462	24.7954	24.6589	43.5655	43.2779	38.1528	38.2678	-0.094527	2
-15	54.4737	37.568	37.3077	24.0381	23.8707	41.9738	41.6233	37.6842	37.8244	-0.116171	2
-14	53.3684	37.0757	36.7692	23.2795	23.0826	40.3893	39.9796	37.2127	37.3766	-0.136964	2
-13	52.2632	36.5814	36.2308	22.5195	22.2944	38.8122	38.347	36.7383	36.9243	-0.156873	2
-12	51.1579	36.0849	35.6923	21.7581	21.5062	37.2429	36.726	36.2607	36.4675	-0.175867	2
-11	50.0526	35.5861	35.1538	20.9952	20.718	35.6814	35.1168	35.7801	36.0059	-0.193909	2
-10	48.9474	35.0851	34.6154	20.2308	19.9298	34.1282	33.5198	35.2961	35.5394	-0.210961	2
-9	47.8421	34.5817	34.0769	19.4649	19.1416	32.5836	31.9354	34.8087	35.0679	-0.226981	2
-8	46.7368	34.0758	33.5385	18.6973	18.3534	31.0478	30.364	34.3177	34.5912	-0.241925	2
-7	45.6316	33.5673	33	17.928	17.5653	29.5213	28.806	33.8231	34.1092	-0.255745	2
-6	44.5263	33.0562	32.4615	17.1569	16.7771	28.0043	27.262	33.3246	33.6215	-0.26839	2
-5	43.4211	32.5423	31.9231	16.3841	15.9889	26.4975	25.7324	32.8221	33.1281	-0.279801	2
-4	42.3158	32.0254	31.3846	15.6093	15.2007	25.0011	24.2178	32.3153	32.6287	-0.289918	2
-3	41.2105	31.5056	30.8462	14.8326	14.4125	23.5157	22.7188	31.8042	32.123	-0.298673	2
-2	40.1053	30.9825	30.3077	14.0538	13.6243	22.042	21.2362	31.2885	31.6108	-0.305989	2
-1	39	30.4561	29.7692	13.2728	12.8362	20.5804	19.7706	30.7678	31.0918	-0.311785	2
0	37.8947	29.9261	29.2308	12.4896	12.048	19.1317	18.3229	30.242	30.5656	-0.315968	2
1	36.7895	29.3923	28.6923	11.7039	11.2598	17.6967	16.894	29.7108	30.0319	-0.318433	2
2	35.6842	28.8546	28.1538	10.9156	10.4716	16.2763	15.4851	29.1737	29.4902	-0.319064	2
3	34.5789	28.3126	27.6154	10.1246	9.68341	14.8715	14.0972	28.6304	28.9401	-0.317726	2
4	33.4737	27.7661	27.0769	9.33074	8.89523	13.4833	12.7317	28.0804	28.381	-0.314265	2
5	32.3684	27.2146	26.5385	8.53369	8.10704	12.1133	11.3902	27.5231	27.8123	-0.308503	2
6	31.2632	26.6578	26	7.73324	7.31886	10.7629	10.0746	26.958	27.2333	-0.300228	2
7	30.1579	26.095	25.4615	6.92906	6.53067	9.43423	8.78713	26.3842	26.643	-0.289188	2
8	29.0526	25.5258	24.9231	6.12077	5.74249	8.12952	7.5304	25.8008	26.0405	-0.275072	2
9	27.9474	24.9492	24.3846	5.30788	4.95431	6.85177	6.30778	25.2067	25.4243	-0.257496	2
10	26.8421	24.3642	23.8462	4.48976	4.16612	5.60487	5.12361	24.6002	24.7927	-0.23596	2
11	25.7368	23.7694	23.3077	3.66555	3.37794	4.39405	3.98363	23.9792	24.1434	-0.209798	2
12	24.6316	23.1628	22.7692	2.83402	2.58975	3.22687	2.89606	23.3408	23.4732	-0.178057	2
13	23.5263	22.541	22.2308	1.99321	1.80157	2.11524	1.8736	22.6802	22.7769	-0.139264	2
14	22.4211	21.8978	21.6923	1.13946	1.01338	1.08128	0.939344	21.9885	22.0453	-0.0907649	2
15	21.3158	21.2157	21.1538	0.262598	0.225196	0.185801	0.154515	21.2415	21.254	-0.0257249	2
16	20.2105	20.2105	20.6154	0	-0.562989	0	0	20.2105	20.2105	0	2
17	19.1053	19.1053	20.0769	0	-1.35117	0	0	19.1053	19.1053	0	2
18	18	18	19.5385	0	-2.13936	0	0	18	18	0	3
19	18	18	19.5385	0	-2.13936	0	0	18	18	0	3
20	18	18	19.5385	0	-2.13936	0	0	18	18	0	3
